# Supplementary material for: Rice Hull Extract (RHE) Suppresses Adiposity in High-Fat Diet-Induced Obese Mice and Inhibits Differentiation of 3T3-L1 Preadipocytes
Source: PubMed Central journal article supplement (PMC6566172; doi:10.3390/nu11051162), 2019-05-24
Supplement: nutrients-11-01162-s001.pdf [file nutrients-11-01162-s001.pdf]

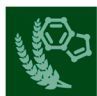

Supplementary Table S1. Ingredient composition of each diet.

| Content            | Normal diet | Content             | HFD    |
|--------------------|-------------|---------------------|--------|
|                    | % kcal      |                     | % kcal |
| Protein            | 20.8        | Protein             | 20     |
| Carbogydrate       | 57.7        | Carbogydrate        | 35     |
| Fat                | 11.5        | Fat                 | 45     |
| <b>Ingredient</b>  | gm          | <b>Ingredient</b>   | gm     |
| Casein             | 200         | Casein              | 200    |
| L-cystine          | 0           | L-cystine           | 3      |
| Corn starch        | 150         | Corn starch         | 72.8   |
| Maltodextrin10     | 0           | Lodex 10            | 100    |
| Sucrose            | 500         | Sucrose             | 176.8  |
| Cellulose, BW200   | 50          | Solka flocc, FCC200 | 50     |
| Corn oil           | 50          | Soybean oil         | 50     |
| Lard               | 0           | Lard                | 177.5  |
| Mineral Mix S10001 | 35          | Mineral Mix S10026B | 50     |
| Vitamin Mix V10001 | 10          | Vitamin Mix V10001  | 1g     |
| Choline Bitartrate | 2           | Choline Bitartrate  | 2      |
|                    |             | FD&C Red Dye #40    | 0.05   |
